# Supplementary material for: Efficacy and Safety of Ketogenic Diet Treatment in Pediatric Patients with Mitochondrial Disease
Source: MDPI journal article supplement (doi:10.3390/nu16060812), 2024-03-13
Supplement: s1 [file s1]

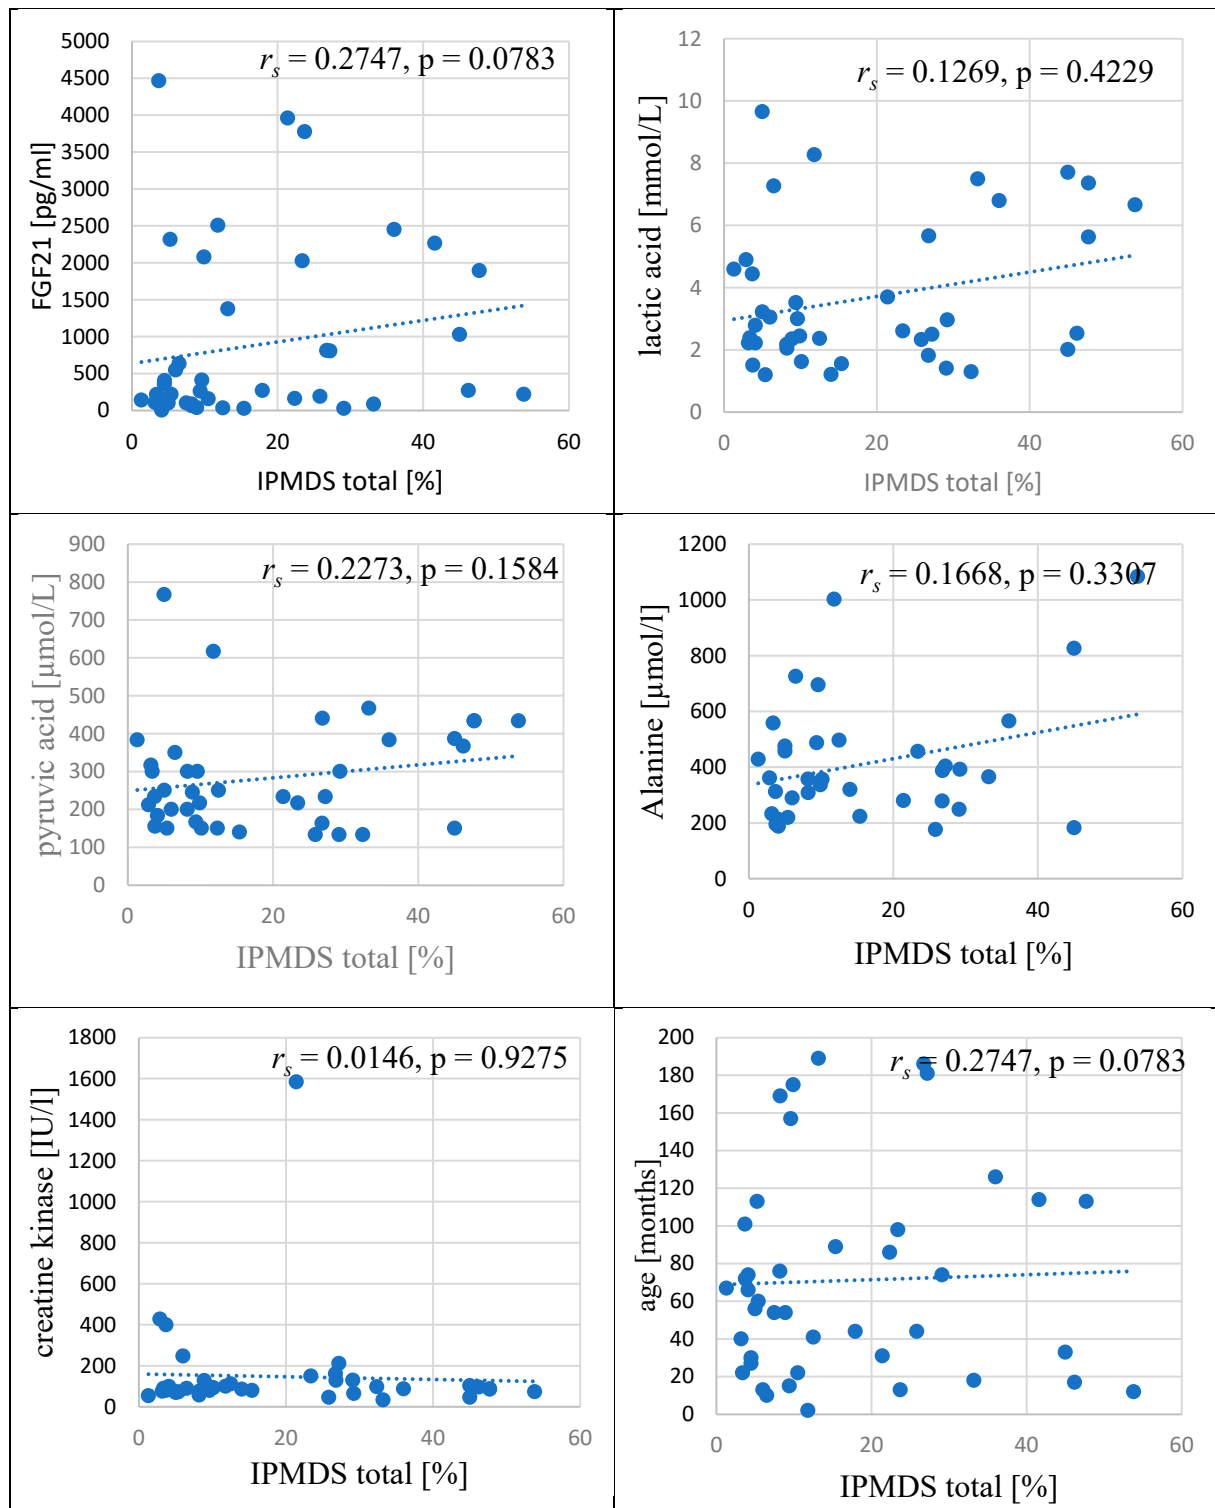

Figure S1. Correlation between individual biomarkers of mitochondrial disease and patients' age and disease severity (IPMDS)

Table S1. Patient data in the study groups

| Group                  | No   | Age at study entry (months) | Gender | Follow-up time (months) | Genetic diagnosis | Predominant clinical symptoms at study entry                                                                          |
|------------------------|------|-----------------------------|--------|-------------------------|-------------------|-----------------------------------------------------------------------------------------------------------------------|
| Group 1: MD + KD       | 1.1  | 113                         | M      | 13                      | <i>MT-TK</i>      | Myopathy, myoclonus, ataxia, hearing loss, short stature, PEG                                                         |
|                        | 1.2  | 10                          | M      | 12                      | <i>PDHA1</i>      | Delayed psychomotor development, short stature                                                                        |
|                        | 1.3  | 41                          | M      | 13                      | <i>PDHA1</i>      | Delayed psychomotor development, ataxia, tremor, short stature                                                        |
|                        | 1.4  | 157                         | M      | 12                      | <i>MTND5</i>      | Intellectual disability (mild), optic nerve atrophy, epilepsy, precocious puberty, hypertrophic cardiomyopathy        |
|                        | 1.5  | 74                          | M      | 15                      | <i>PDHA1</i>      | Tetraparesis, ataxia, tremor, peripheral neuropathy                                                                   |
|                        | 1.6  | 33                          | F      | 11                      | <i>SLC25A12</i>   | Developmental delay, tetraparesis, hypotonia, epilepsy, dysphagia, PEG                                                |
|                        | 1.7  | 181                         | F      | 5                       | mtDNA del         | Myopathy, ptosis, ataxia, tremor, hearing loss, weight deficiency                                                     |
|                        | 1.8  | 56                          | F      | 11                      | <i>PDHA1</i>      | Tremor, hypotonia, exercise intolerance, epilepsy, short stature                                                      |
|                        | 1.9  | 12                          | M      | 5                       | <i>PDHA1</i>      | Developmental delay, tetraparesis, hypotonia, refractory epilepsy, microcephaly, short stature, PEG                   |
|                        | 1.10 | 60                          | F      | 12                      | <i>PDHA1</i>      | Myalgia, exercise intolerance, short stature                                                                          |
|                        | 1.11 | 66                          | M      | 8                       | <i>BCS1L</i>      | Exercise intolerance, muscle weakness, hearing loss, pili torti                                                       |
| Group 2: MD without KD | 2.1  | 98                          | M      | 16                      | <i>MT-TK</i>      | Myopathy, myoclonus, ataxia, hearing loss, short stature                                                              |
|                        | 2.2  | 2                           | M      | 11                      | <i>FBXL4</i>      | Lack of progress in psychomotor development, increased muscle tone, epilepsy, cardiomyopathy, fed by nasogastric tube |
|                        | 2.3  | 101                         | F      | 12                      | <i>MT-TL1</i>     | Myopathy, reduced muscle tone, short stature                                                                          |

|                                |      |     |   |    |                |                                                                                             |
|--------------------------------|------|-----|---|----|----------------|---------------------------------------------------------------------------------------------|
| Group 3 KD without MDDK bez CM | 2.4  | 40  | F | 14 | <i>PDHA1</i>   | Tremor, ataxia, hypotone, short stature                                                     |
|                                | 2.5  | 15  | M | 12 | <i>MT-ATP6</i> | Delayed psychomotor development, hypotonia, cardiomyopathy, weight deficiency               |
|                                | 2.6  | 175 | F | 14 | mtDNA del      | Myopathy, intention tremor, ptosis, sensorineural hearing loss, diabetes                    |
|                                | 2.7  | 13  | M | 9  | <i>NUBPL</i>   | Trochlear nerve palsy                                                                       |
|                                | 2.8  | 18  | M | 12 | nd             | Delayed psychomotor development, reduced muscle tone, epilepsy, microcephaly, short stature |
|                                | 2.9  | 31  | F | 13 | <i>COQ8A</i>   | Delayed speech development, developmental regression, ataxia                                |
|                                | 2.10 | 76  | M | 10 | <i>POLG</i>    | Epilepsy, intention tremor, post-acute liver failure                                        |
|                                | 3.1  | 79  | M | 13 | <i>SLC2A1</i>  | Delayed psychomotor development, clumsiness, intention tremor                               |
|                                | 3.2  | 55  | F | 12 | <i>ASLD</i>    | Developmental delay, spastic tetraparesis, epileptic encephalopathy, microcephaly, PEG      |
|                                | 3.3  | 107 | M | 6  | <i>MOCS1</i>   | Spastic tetraparesis, epileptic encephalopathy                                              |
|                                | 3.4  | 19  | M | 3  | <i>GLUL</i>    | Delayed psychomotor development, epileptic encephalopathy                                   |
|                                | 3.5  | 20  | M | 12 | nd             | Delayed psychomotor development, epilepsy, microcephaly, CNS defect, ocular hypoplasia      |
|                                | 3.6  | 202 | M | 13 | <i>SLC2A1</i>  | Intellectual disability, dystonia                                                           |
|                                | 3.7  | 77  | M | 12 | nd             | Delayed psychomotor development, spastic tetraparesis, involuntary movements, epilepsy      |
|                                | 3.8  | 62  | F | 13 | nd             | Visual impairment, hearing loss, epilepsy                                                   |
|                                | 3.9  | 18  | F | 3  | nd             | Delayed psychomotor development, spastic                                                    |

|                                   |      |     |   |    |                |                                                                     |
|-----------------------------------|------|-----|---|----|----------------|---------------------------------------------------------------------|
| Group 4 without MD and without KD | 3.10 | 162 | M | 12 | nd             | tetraparesis, epileptic encephalopathy                              |
|                                   | 4.1  | 39  | F | 13 | <i>RANSET2</i> | Intellectual disability, epilepsy                                   |
|                                   | 4.2  | 11  | M | 7  | nd             | Spastic tetraparesis, strabismus, leukoencephalopathy               |
|                                   | 4.3  | 72  | F | 12 | nd             | Delayed psychomotor development                                     |
|                                   | 4.4  | 11  | F | 16 | <i>ADAR</i>    | Healthy, no symptoms                                                |
|                                   | 4.5  | 11  | M | 10 | nd             | Spastic tetraparesis, encephalopathy                                |
|                                   | 4.6  | 8   | M | 16 | nd             | Delayed psychomotor development, epilepsy, microcephaly, CNS defect |
|                                   | 4.7  | 31  | M | 9  | nd             | Delayed psychomotor development, West syndrome                      |
|                                   | 4.8  | 78  | M | 12 | <i>ABCD1</i>   | Delayed psychomotor development                                     |
|                                   | 4.9  | 72  | M | 15 | <i>OTC</i>     | Adrenal insufficiency                                               |
|                                   | 4.10 | 46  | F | 8  | nd             | Delayed psychomotor development, epilepsy                           |
|                                   | 4.11 | 31  | F | 15 | nd             | Delayed psychomotor development                                     |

F – female KD – ketogenic diet, MD - mitochondrial disease, M – male, nd – no date, PEG – percutaneous feeding gastrostomy

Table S2. Biochemical parameters in patients with mitochondrial disease (group 1 + 2) and in patients without disease (group 3 + 4)

| Biochemical parameters<br>(normal range)          | Group 1 + 2<br>Median (range) | Group 3 + 4<br>Median (range) |
|---------------------------------------------------|-------------------------------|-------------------------------|
| FGF21 [pg/mL]<br>(normal range < 275)             | 412.6 (4.1 – 4466.9)          | 52.9 (6.1 – 294.4)            |
| Lactic acid [mmol/L]<br>(normal range: 0.5 – 2.2) | 3.0 (1.2 – 9.6)               | 1.7 (0.9 – 6.0)               |
| Pyruvic acid [μmol/L] (normal<br>range: 50 – 200) | 233.4 (133.4 – 766.9)         | 166.7 (66.7 – 316.7)          |
| Alanine [μmol/L] (normal<br>range: 144 – 418)     | 361 (182 – 1084)              | 241 (173 – 297)               |
| Creatine kinase [IU/l] (normal<br>range: 0 – 154) | 93 (34 – 1584)                | 107 (38 – 972)                |

Table S3. Biochemical parameters in patients with mitochondrial disease at visit V0 and V12

| Biochemical parameters<br>(normal range)          | Group 1<br>(MD + KD)<br>Median<br>(range) V0 | Group 1<br>(MD + KD)<br>Median<br>(range)V12 | Group 2 (MD<br>without KD)<br>Median<br>(range)V0 | Group 2 (MD<br>without KD)<br>Median<br>(range)V12 |
|---------------------------------------------------|----------------------------------------------|----------------------------------------------|---------------------------------------------------|----------------------------------------------------|
| FGF21 [pg/ml]<br>(normal range < 275)             | 220.5<br>(4.1 – 1895.9)                      | 141.2<br>(29.2 – 2453.0)                     | 1288.6<br>(65.5 – 4466.9)                         | 381,.3<br>(102.3 – 3776.0)                         |
| Lactic acid [mmol/L]<br>(normal range: 0.5 – 2.2) | 2.8<br>(1.2 – 9.6)                           | 2.3<br>(1.5 – 6.8)                           | 3.3<br>(2.2 – 8.2)                                | 3.1<br>(1.2 – 7.2)                                 |
| Pyruvic acid [μmol/L]<br>(normal range: 50 – 200) | 266.7<br>(133 – 767)                         | 250.0<br>(133 – 383)                         | 216.7<br>(164 – 617)                              | 250.0<br>(133 – 433)                               |
| Alanine [μmol/l]<br>(normal range: 144 – 418)     | 439<br>(182 – 1084)                          | 278<br>(175 – 565)                           | 346<br>(232 – 1002)                               | 374<br>(319 – 826)                                 |
| Creatine kinase [IU/l]<br>(normal range: 0 – 154) | 87<br>(46 – 212)                             | 85<br>(46 – 161)                             | 96<br>(34 – 1584)                                 | 90<br>(65 – 428)                                   |
